# Supplementary material
Source: publisher site journal article supplement (https://www.dovepress.com/get_supplementary_file.php?f=306255.docx)
Supplement: Supplementary file 1 [file get_supplementary_file.php]

**Supplementary Table S1** Between-group difference on primary outcomes after 7 days treatment (mITT analysis, n=209)

|  |  |  | **Non-inferiority 1-tailed test a** | | | **Superiority 2-tailed test b** | |
| --- | --- | --- | --- | --- | --- | --- | --- |
| **Outcome**  **measure** | **Experimental**  **group** (*n* = 108) | **Control**  **group** (*n* = 101) | Non-inferiority Margin (δ) | Z | *P* value | Z | *P* value |
| MAS | 23.00 (9.00 - 38.00) | 13.00 (5.00 - 32.00) | 6.94 | -5.319 | ＜0.001* | -2.143 | 0.032 |
| FMA | 51.50 (21.00 - 79.50) | 33.00 (17.00 - 68.50) | 12.00 | -5.175 | ＜0.001* | -2.165 | 0.030 |
| ARAT | 16.50 (0.00 - 38.75) | 0.00 (0.00 - 34.00) | 10.00 | -6.395 | ＜0.001* | -1.985 | 0.047 |
| Change in MAS | 5.00 (1.00 - 14.00) | 3.00 (0.00 - 7.00) | 2.15 | -5.889 | ＜0.001* | -2.994 | 0.003* |
| Change in FMA | 7.00 (1.00 - 24.50 ) | 4.00 (0.00 - 9.00) | 3.62 | -5.749 | ＜0.001* | -2.940 | 0.003* |
| Change in ARAT | 1.00 (0.00 - 17.00) | 0.00 (0.00 - 4.00) | 3.65 | -8.085 | ＜0.001* | -3.409 | 0.001* |

**Notes:** Outcome measures presented as median (IQR); overall alpha is 0.025 for both noninferiority and superiority testing. * Test on outcome difference within the given noninferiority margins or have superiority (*P* ≤ 0.05/3 = 0.0167). a, Mann-Whitney *U* or Wilcoxon Rank-Sum Location Difference Test for Non-Inferiority; b, Mann-Whitney *U* Test for Two Independent Samples.

**Abbreviations:** IQR, interquartile range; MAS, Motor Assessment Scale; FMA, Fugl-Meyer Assessment; ARAT, Action Research Arm Test.

**Supplementary Table S2** Median (IQR) secondary outcomes scores for each group, and results of GEE analysis (mITT analysis, n = 209; Experimental group n = 108, Control group n = 101)

| **Outcome measure** | **Baseline (t0)** | | **7days (t1)** | | **4weeks (t2)** | | **12weeks (t3)** | | **Group ˄** | | **Time Effect ˄** | | **Group * Time Effect ˄** | |
| --- | --- | --- | --- | --- | --- | --- | --- | --- | --- | --- | --- | --- | --- | --- |
|  | Experimental group | Control group | Experimental group | Control group | Experimental group | Control group | Experimental group | Control group | Wald Chi-Square | *P* value | Wald Chi-Square | *P* value | Wald Chi-Square | *P* value | |
| MBI | 29.50 (20.75 -50.00) | 28.00 (20.00 - 55.00) | 52.00 (25.25 -77.75) | 39.00 (23.00 - 67.50) | 78.00 (52.25 -93.50) | 65.00 (41.50 - 86.50) | 87.50 (60.50 - 100.00) | 82.00 (65.00 - 100.00) | 1.980 | 0.159 | 687.600 | ＜0.001* | 25.021 | ＜0.001* | |
| NIHSS | 6.00 (4.00 -9.00) | 6.00 (3.00 - 10.00) | 5.00 (2.00 - 6.50) | 4.00 (2.00 - 9.00) | 2.00 (0.00 - 4.00) | 2.00 (1.00 -5.00) | 0.00 (0.00 - 2.00) | 0.00 (0.00 - 1.00) | 0.047 | 0.829 | 448.300 | ＜0.001* | 11.774 | 0.008* | |
| mRS | 4.00 (4.00 - 4.00) | 4.00 (4.00 -4.00) | 4.00 (3.00 - 4.00) | 4.00 (3.00 - 4.00) | 3.00 (2.00 -4.00) | 3.00 (3.00 - 4.00) | 2.00 (2.00 - 3.00) | 3.00 (2.00 - 3.00) | 1.847 | 0.174 | 245.400 | ＜0.001* | 11.484 | 0.009* | |

**Notes:** ˄ Results of Generalized estimating equation (GEE) analysis for group by time effect across all timepoints; * *P* < 0.05/3 = 0.0167.

**Abbreviations:** IQR, interquartile range; MBI, modified Barthel index; NIHSS, National Institutes of Health Stroke Scale; mRS, modified Rankin Scale.

**Supplementary Table S3** Time effect analysis with Friedman's test and Bonferroni corrected pairwise comparisons (PP analysis, n = 200, Experimental group n = 105, Control group n = 95)

| **Outcome measures** | | **Time effect** | | **Bonferroni corrected pairwise comparisons** | | | | | | | | | | | | |
| --- | --- | --- | --- | --- | --- | --- | --- | --- | --- | --- | --- | --- | --- | --- | --- | --- |
|  | |  | | t0 - t1 | | t0 - t2 | | t0 - t3 | | t1 - t2 | | t1 - t3˄ | | t2 - t3 | | |
|  | | F | *P* value | F | *P* value | F | *P* value | F | *P* value | F | *P* value | F | *P* value | F | *P* value |
| MBI | Experi-mental  group | 278.921 a | ＜0.001* | -0.833 | ＜0.001* | -1.867 | ＜0.001* | -2.690 | ＜0.001* | -1.033 | ＜0.001* | -1.857 | ＜0.001* | -0.824 | ＜0.001* |
| Control  group | 235.273 a | ＜0.001* | -0.647 | 0.003* | -1.784 | ＜0.001* | -2.453 | ＜0.001* | -1.137 | ＜0.001* | -1.805 | ＜0.001* | -0.668 | 0.002* |
| NIHSS | | 480.816 b | ＜0.001* | 0.630 | ＜0.001* | 1.718 | ＜0.001* | 2.393 | ＜0.001* | 1.088 | ＜0.001* | 1.763 | ＜0.001* | 0.675 | ＜0.001* |
| mRS | | 401.888 b | ＜0.001* | 0.293 | 0.141 | 1.088 | ＜0.001* | 1.900 | ＜0.001* | 0.795 | ＜0.001* | 1.608 | ＜0.001* | 0.813 | ＜0.001* |

**Notes:** a, Simple effect of time; b, Main effect of time; t0: baseline, day of enrolment; t1: 7 days post-intervention; td: on the day of discharge; t2: 4 weeks post-intervention; t3: 12 weeks post-intervention; * *P* < 0.05 after adjustment by Bonferroni correction method for multiple tests.

**Abbreviations:** MBI, modified Barthel index; NIHSS, National Institutes of Health Stroke Scale; mRS, modified Rankin Scale.
